# Supplementary material
Source: publisher figshare collection journal article supplement (https://frontiersin.figshare.com/ndownloader/files/12774521)
Supplement: Supplementary file [file 12774521]

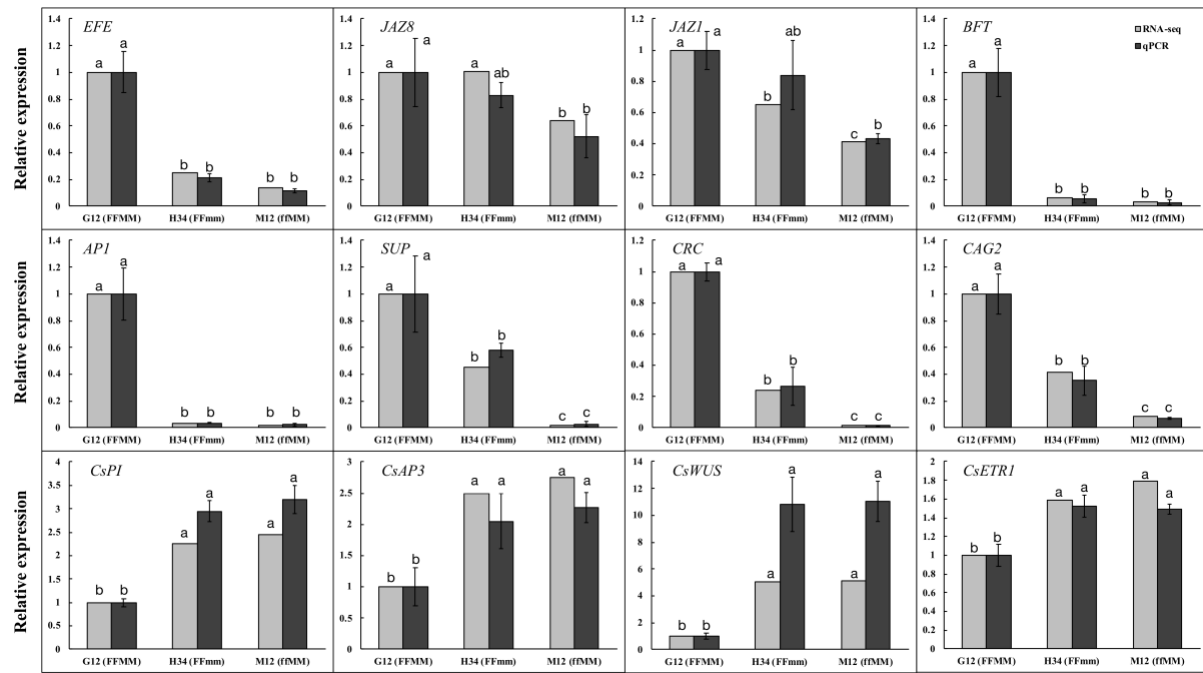

**Supplementary Figure S1 | qRT-PCR validation of DEGs identified by RNA-Seq.** A total of 12 genes selected from DEGs of the two sets of transcriptome comparisons (G12 vs. M12 and G12 vs. H34) for qRT-PCR confirmation. The cucumber *Actin* was used as an internal control, and these experiments were repeated with three biological samples. Error bars indicate the standard errors. Different letters (a, b, c) indicate significant expression differences ( $P < 0.05$ ) of the 12 genes in G12, H34 and M12.
